# Supplementary material for: Evaluation of Tobramycin and Ciprofloxacin as a Synergistic Combination Against Hypermutable Pseudomonas Aeruginosa Strains via Mechanism-Based Modelling
Source: MDPI journal article supplement (doi:10.3390/pharmaceutics11090470), 2019-09-12
Supplement: s1 [file s1]

# Supplementary Materials: Evaluation of Tobramycin and Ciprofloxacin as a Synergistic Combination Against Hypermutable *Pseudomonas Aeruginosa* Strains via Mechanism-Based Modelling

Vanessa E. Rees, Jürgen B. Bulitta, Antonio Oliver, Roger L. Nation and Cornelia B. Landersdorfer

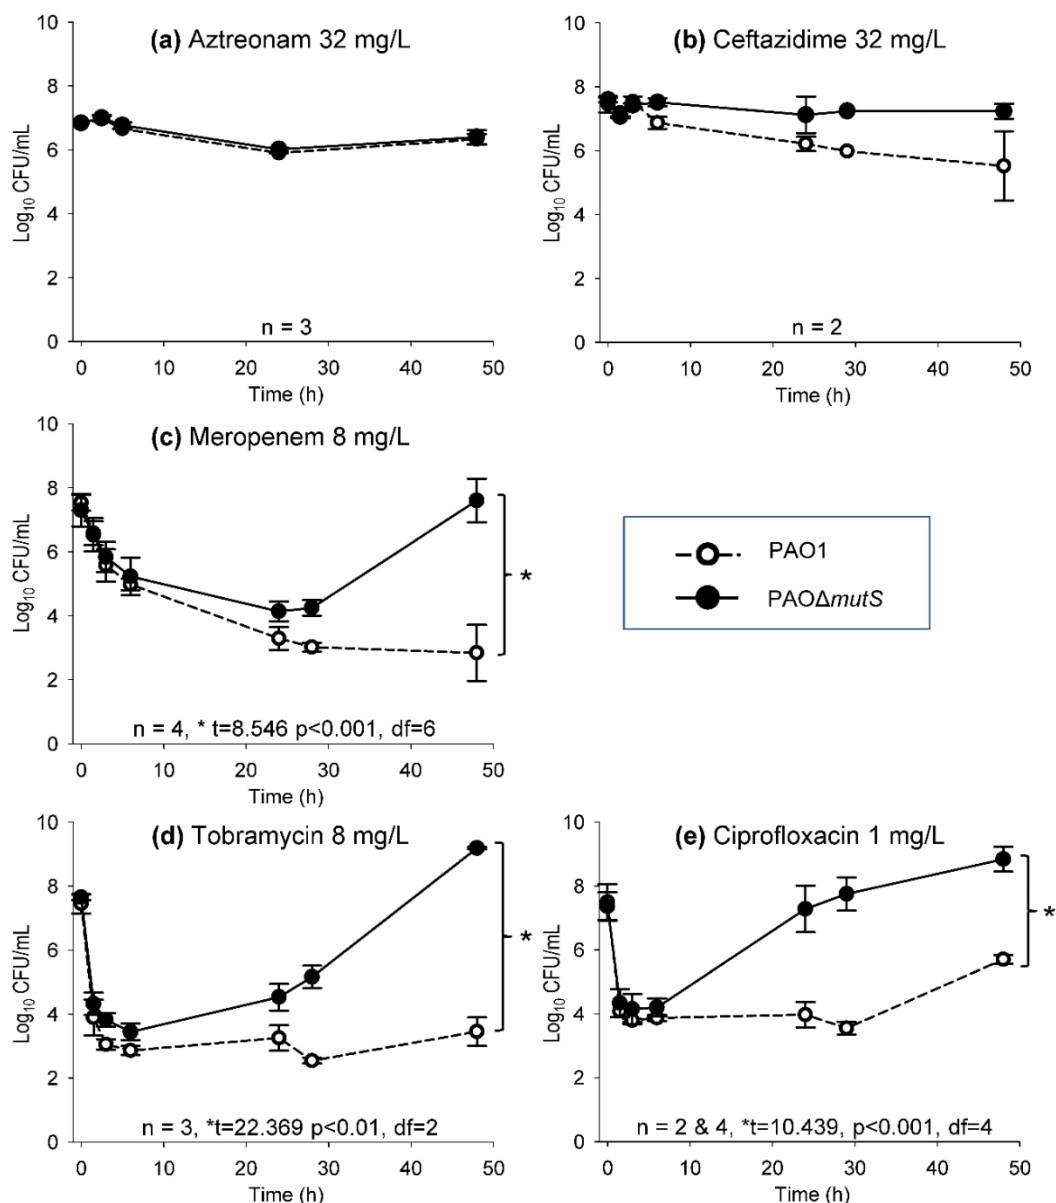

**Figure S1.** The mean  $\log_{10}$  CFU/mL and standard deviations (error bars) based on  $n = 3-4$  replicates, except for ceftazidime where  $n = 2$ , for statistical analysis of key clinically achievable antibiotic concentrations against high inocula of PAO1 and PAO $\Delta$ mutS. The antibiotics studied were: (a), aztreonam 32 mg/L, (b), ceftazidime 32 mg/L, (c), meropenem 8 mg/L, (d), tobramycin 8 mg/L, and (e), ciprofloxacin 1 mg/L. The broken lines with hollow symbols represent PAO1 and the solid lines and symbols are PAO $\Delta$ mutS.

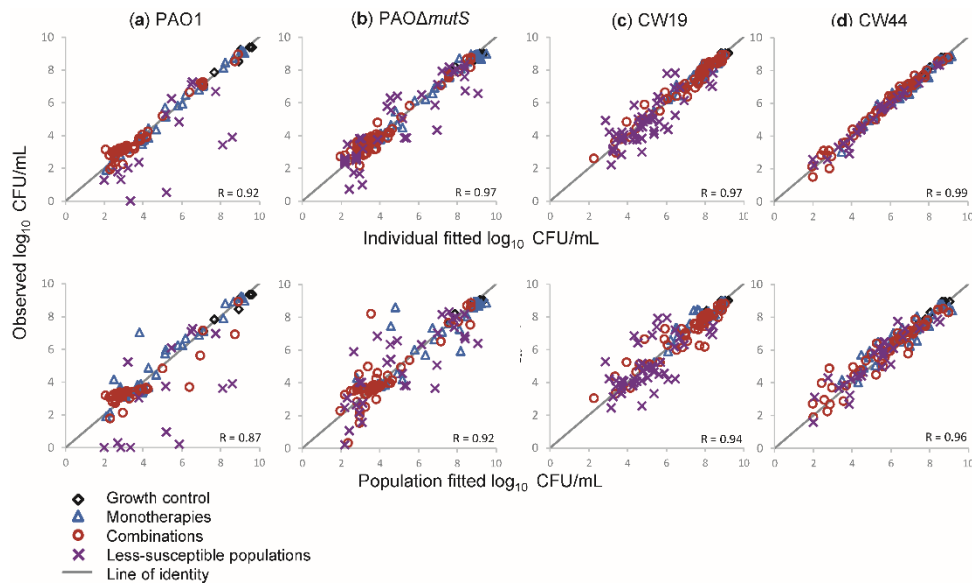

**Figure S2.** Observed versus individual and population fitted viable counts for tobramycin and ciprofloxacin alone and in combinations against PAO1, PAO $\Delta$ mutS, CW19 and CW44.

**Table S1.** The approximate unbound average steady-state plasma concentration of the maximum daily dose for the studied antibiotics.

| Antibiotic    | Maximum Daily Dose (mg) | $\sim fC_{ss,avg}$ (mg/L) | Reference |
|---------------|-------------------------|---------------------------|-----------|
| aztreonam     | 8000                    | 26.7–35.2                 | [1]       |
| ceftazidime   | 6000                    | 33.8–41.4                 | [2]       |
| imipenem      | 4000                    | 12.2–18.8                 | [3,4]     |
| meropenem     | 6000                    | 15.0–15.4                 | [5,6]     |
| tobramycin    | 700 <sup>a</sup>        | 3.1–3.9                   | [7,8]     |
| ciprofloxacin | 1200                    | 0.96–1.4                  | [9,10]    |

<sup>a</sup> Based on 70 kg body weight, 10 mg/kg;  $fC_{ss,avg}$ , unbound average steady-state plasma concentration.

## References

- Vinks AA, van Rossem RN, Mathot RA, Heijerman HG, Mouton JW. Pharmacokinetics of aztreonam in healthy subjects and patients with cystic fibrosis and evaluation of dose-exposure relationships using monte carlo simulation. *Antimicrob Agents Chemother.* **2007**, *51*, 3049–3055.
- Bulitta JB, Landersdorfer CB, Huttner SJ, Drusano GL, Kinzig M, Holzgrabe U, et al. Population pharmacokinetic comparison and pharmacodynamic breakpoints of ceftazidime in cystic fibrosis patients and healthy volunteers. *Antimicrob Agents Chemother.* **2010**, *54*, 1275–1282.
- Jaruratanasirikul S, Raungsri N, Punyo J, Sriwiriyan S. Pharmacokinetics of imipenem in healthy volunteers following administration by 2 h or 0.5 h infusion. *J Antimicrob Chemother.* **2005**, *56*, 1163–1165.
- Sakka SG, Glauner AK, Bulitta JB, Kinzig-Schippers M, Pfister W, Drusano GL, et al. Population pharmacokinetics and pharmacodynamics of continuous versus short-term infusion of imipenem-cilastatin in critically ill patients in a randomized, controlled trial. *Antimicrob Agents Chemother.* **2007**, *51*, 3304–3310.
- Krueger WA, Bulitta J, Kinzig-Schippers M, Landersdorfer C, Holzgrabe U, Naber KG, et al. Evaluation by monte carlo simulation of the pharmacokinetics of two doses of meropenem administered intermittently or as a continuous infusion in healthy volunteers. *Antimicrob Agents Chemother.* **2005**, *49*, 1881–1889.
- Bui KQ, Ambrose PG, Nicolau DP, Lapin CD, Nightingale CH, Quintiliani R. Pharmacokinetics of high-dose meropenem in adult cystic fibrosis patients. *Chemother.* **2001**, *47*, 153–156.
- Lee C, Walker SAN, Walker SE, Seto W, Simor A, Jeschke M. A prospective study evaluating tobramycin pharmacokinetics and optimal once daily dosing in burn patients. *Burns.* **2017**, *43*, 1766–1774.
- Hennig S, Standing JF, Staatz CE, Thomson AH. Population pharmacokinetics of tobramycin in patients with and without cystic fibrosis. *Clin Pharmacokinet.* **2013**, *52*, 289–301.

9. Shah A, Lettieri J, Kaiser L, Echols R, Heller AH. Comparative pharmacokinetics and safety of ciprofloxacin 400 mg i.v. thrice daily versus 750 mg po twice daily. *J Antimicrob Chemother.* **1994**, 33, 795–801.
10. Forrest A, Nix DE, Ballow CH, Goss TF, Birmingham MC, Schentag JJ. Pharmacodynamics of intravenous ciprofloxacin in seriously ill patients. *Antimicrob Agents Chemother.* **1993**, 37, 1073–1081.
